# Supplementary material
Source: PubMed Central journal article supplement (PMC3121341)

## SUPPLEMENTARY TABLES AND LEGENDS

**Supplementary Table 1**

**Oligonucleotide primers used for RT-qPCR.**

| Primers  | Sequence                                                     | Product length (bp) |
|----------|--------------------------------------------------------------|---------------------|
| cyclin E | F-5' GTTATAAGGGAGACGGGGAG 3'<br>R-5' TGCTCTGCTTCTTACCGCTC 3' | 205                 |
| CDK2     | F-5' CCCTTTCTTCCAGGATGTGA 3'<br>R-5' TCACCCCTGTATTCCCAGAG 3' | 208                 |
| c-ETS1   | F-5' GGATGGGCAAATCTGGTCTA 3'<br>R-5' CCAGAATGGAGAAGGGAACA 3' | 115                 |
| GAPDH    | F-5' CGACCACTTTGTCAAGCTCA 3'<br>R-5' AGGGGTCTACATGGCAACTG 3' | 228                 |

**Supplementary Table 2**

**Oligos used for EMSA**

| Primers   | Sequence                                                                                                 |
|-----------|----------------------------------------------------------------------------------------------------------|
| Consensus | F- 5' CGTCTGCAGGATCCCAGGAAGGTGAGCATAGCCTAC 3'<br>R- 5' GTAGGCTATGCTCACCT <u>TTCC</u> TGGGATCCTGCAGACG 3' |
| cyc E     | F-5' ACTCAGGGCCC <u>GGA</u> ACTCGGCGTCTC 3'<br>R-5' GAGACGCCGAGT <u>TTCC</u> GGGCCCTGAGT 3'              |
| cyc E-mut | F-5' ACTCAGGGCCC <b><u>CTCGAG</u></b> CGGCGTCTC 3'<br>R-5' GAGACGCCG <b><u>CTCGAG</u></b> GGGCCCTGAGT 3' |
| CDK2      | F-5' AGGGAAACGCG <u>GGA</u> AGCAGGGGCGGG 3'<br>R-5' CCCGCCCTGCT <u>TTCC</u> CGGTTTCCCT 3'                |
| CDK2-mut  | F-5' AGGGAAACG <b><u>CTCGAG</u></b> GCAGGGGCGGG 3'<br>R-5' CCCGCCCTGCC <b><u>CTCGA</u></b> GCGTTTCCCT 3' |

The mutated bases are bold faced and underlined. Here, CDK2 represents only proximal c-ETS1 element of *CDK2* promoter.

### Supplementary Table 3

Oligonucleotide primers used for MNase-southern, MNase CHART-PCR, ChIP and ChIP-qPCR.

| Primers  | Sequence                                                             | Product length (bp) |
|----------|----------------------------------------------------------------------|---------------------|
| cyclin E | F-5' GGTGACCTTGGGGATGTCC 3'<br>R-5' AGCCAAGGGGATGTGTGG 3'            | 146                 |
| CDK2     | F-5' GGCTCTGACGTTGACCAATAGAAAG 3'<br>R-5' GGCCAACCTGAAACAATGTTGCC 3' | 124                 |
| CDK2-D   | F-5' AGACAGTGTCGGGGTATGCTATG 3'<br>R-5' CACCAATCCTGGGGAAAATATG 3'    | 157                 |

CDK2 represents only proximal c-ETS-1 element of *CDK2* promoter.

## SUPPLEMENTARY FIGURE LEGENDS

**Supplementary Fig. 1.** Schematic representation of cyclin E and *CDK2* promoters along with site directed mutant of c-ETS1 element. Schematic representation of cyclin E (A) or *CDK2* (B) promoters with either wild type or mutant c-ETS1 elements. The +1 represents the transcriptional start site. CAT and Luciferase are the reporter constructs used for assessing the promoter activity of cyclin E and *CDK2* respectively. \* indicates the site directed mutant bases of the c-ETS1 element.

**Supplementary Fig. 2.** Transfection efficiency showed in terms of EGFP expression. Huh7 cells were transfected with pEGFP-C1 construct along with other expression vectors indicated in each transfection. 48h post-transfected cells were visualized under fluorescent microscopy (Nikon eclipse TE 2000-S) for EGFP expression.

**Supplementary Fig. 3.** Dose dependent activation and competitive inhibition of cyclin E and *CDK2* promoters by c-ETS1 and its dominant negative construct respectively. Relative CAT and luciferase activity of pE-WT and pCDK2-WT reporter transfected in Huh7 cells with either increasing concentrations of c-ETS1 plasmid (50, 100, 200 and 400ug) (A and B) or with c-ETS1 and c-ETS1 DN constructs (C and D). Data shown in A-D are the means  $\pm$  SD of three independent experiments. \* - indicate statistically significant difference at  $p < 0.05$ .

**Supplementary Fig. 4.** Inhibition and induction of c-ETS1 protein respectively with increasing concentration of EGF treatment or c-ETS1 siRNA transfection. Western blot showing the expression of c-ETS1 protein in Huh7 cells either transfected with indicated siRNA at different concentration (A) or treated with increasing amounts of EGF (1, 2.5, 5, 10 and 50 ng/ml) (B).

**Supplementary Fig. 5.** HBx mediated stimulation of G<sub>1</sub>/S phase progression is dependent on induction of cyclin E and *CDK2* genes by c-ETS1. FACS analysis was performed after transfection of Huh7 cells with indicated combinations of expression constructs along with siRNA against c-ETS1 and the percent live cells in G<sub>1</sub> and S phases were measured.

## Supplementary Fig. 1

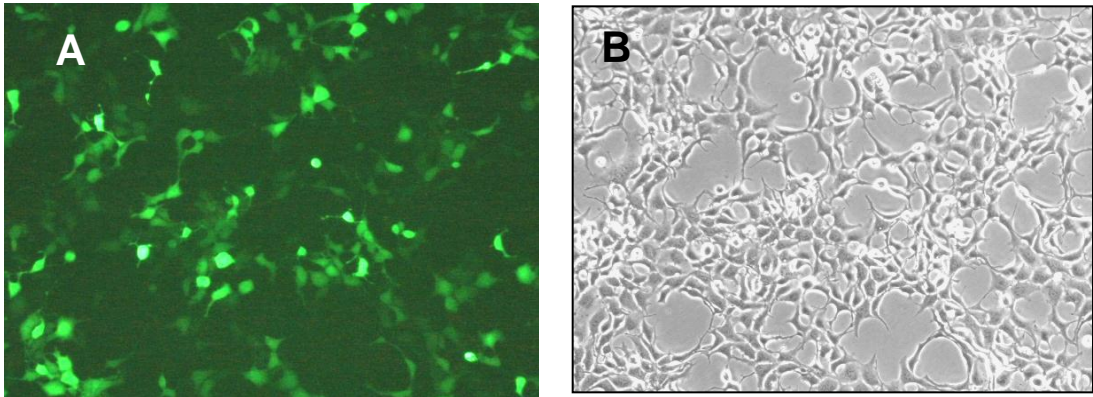

## Supplementary Fig. 2

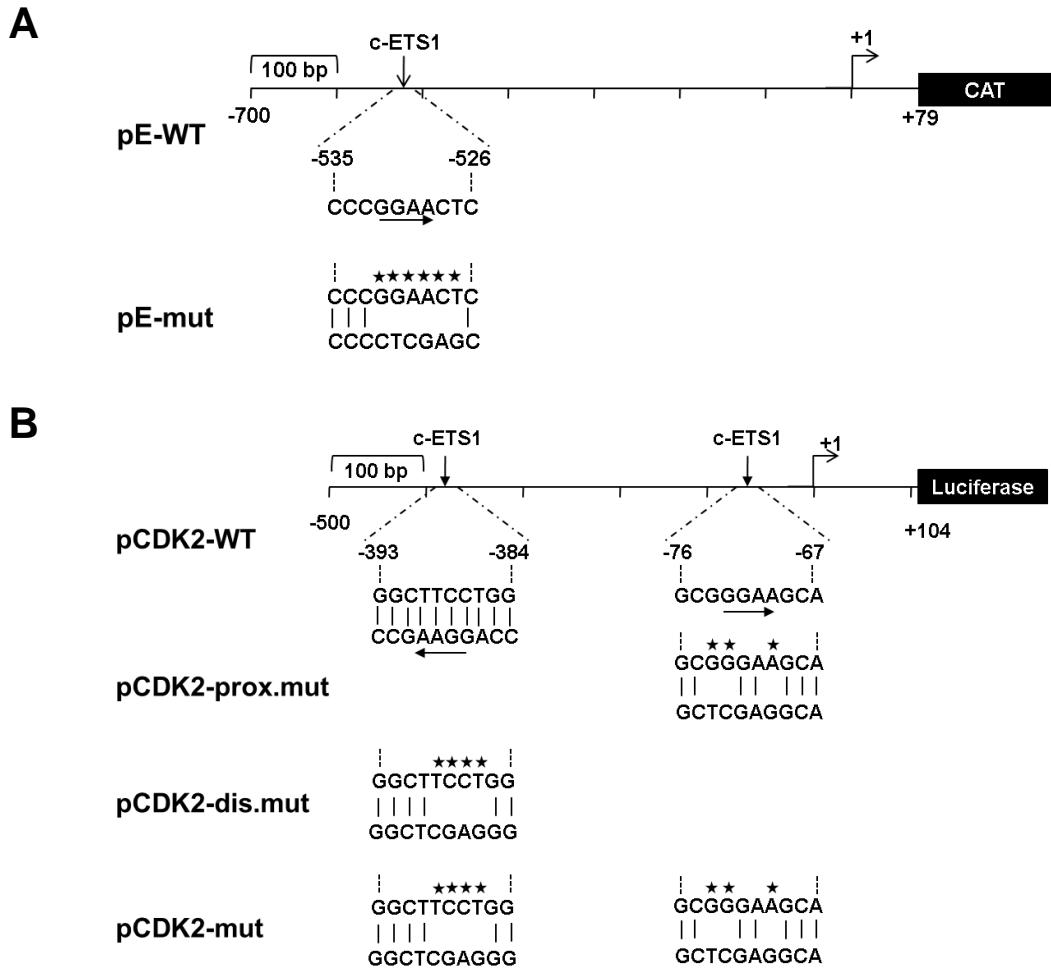

# Supplementary Fig. 3

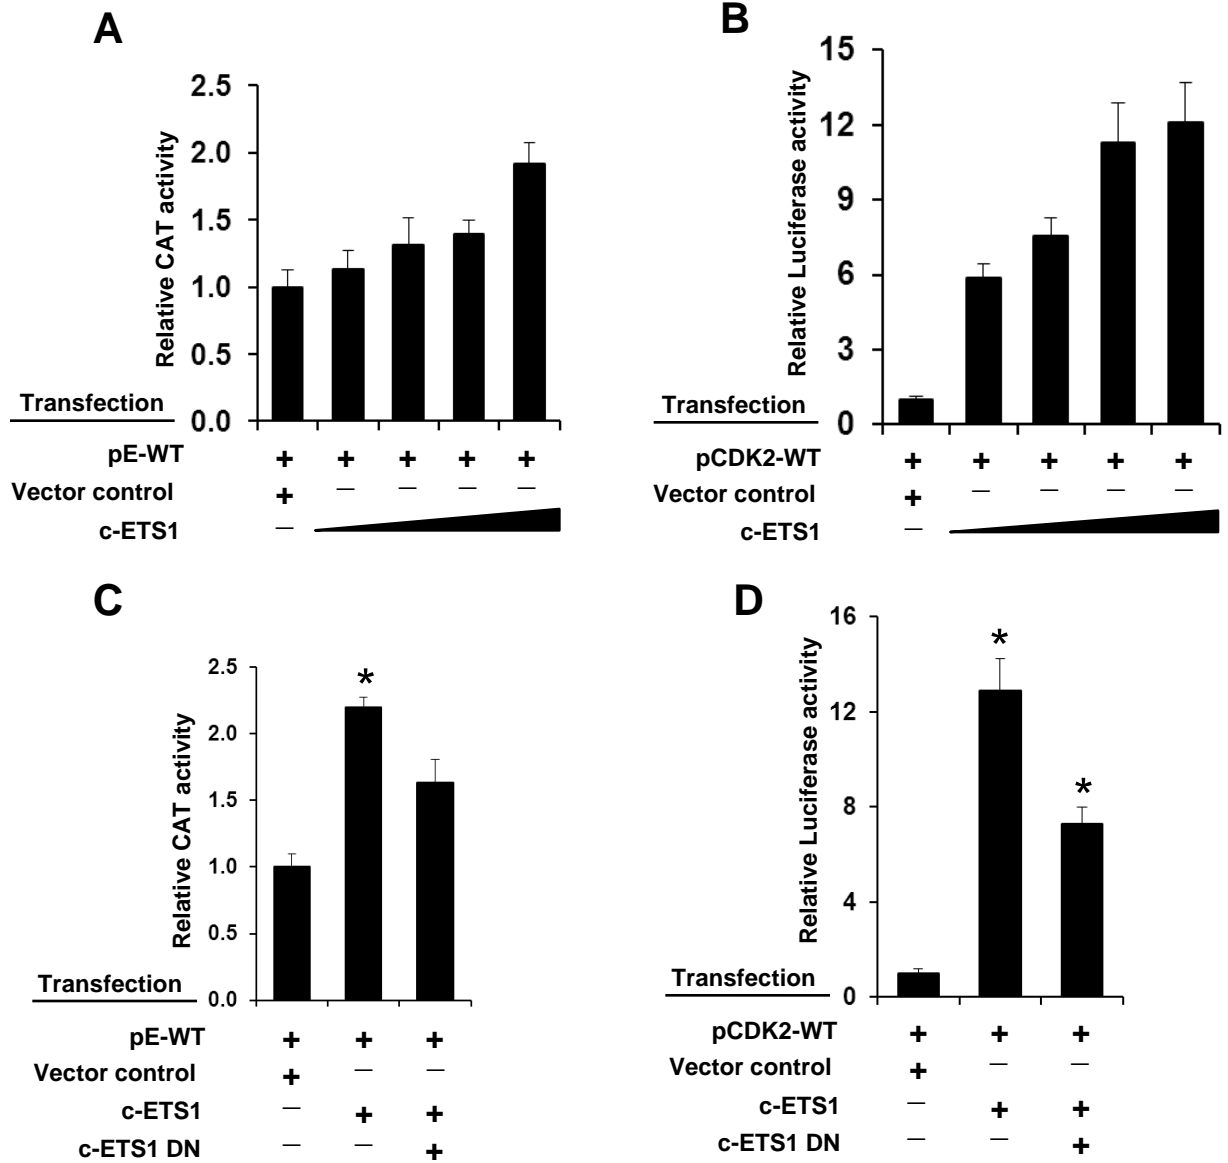

## Supplementary Fig. 4

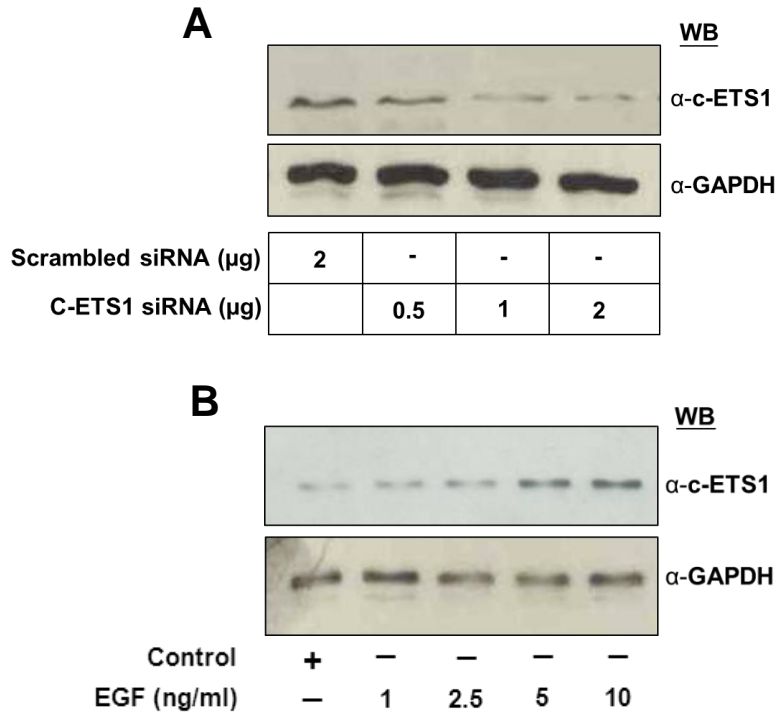

## Supplementary Fig. 5

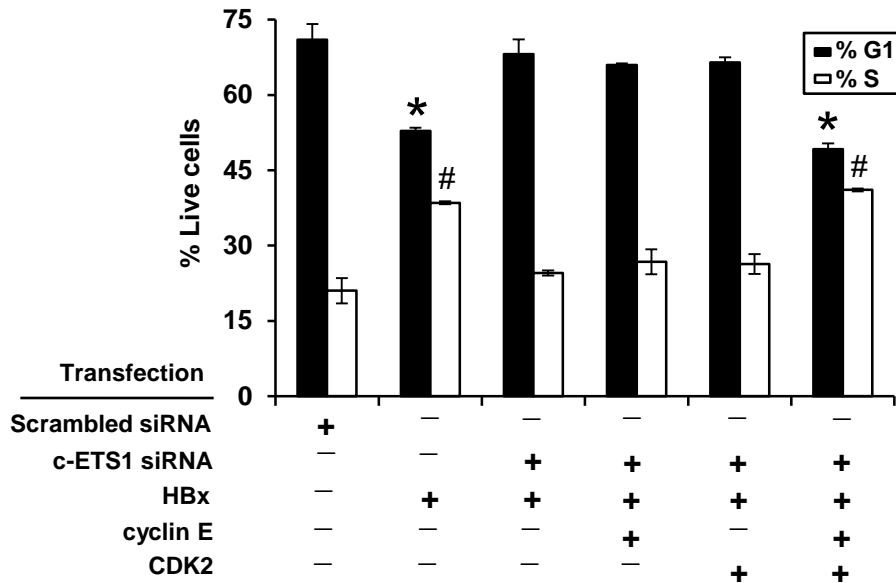

Supplement: supp_M111.238238_M111.238238_article_6703-Supplemental_material.pdf [file supp_M111.238238_M111.238238_article_6703-Supplemental_material.pdf]
